# Supplementary material for: Effectiveness of specific stabilization exercise compared with traditional trunk exercise in women with non-specific low back pain: a pilot randomized controlled trial
Source: PeerJ journal article supplement (doi:10.7717/peerj.10304), 2020-11-27
Supplement: Clinical_Trials_Protocol.pdf [file Clinical_Trials_Protocol.pdf]

## ClinicalTrials.gov Search Results 05/10/2020

| NCT Number | Title                                                                                                                                                      | Other Names                                                         | Status         | Conditions     | Interventions                                                                                                                                                                                | Characteristics                                                                                                                                                                                                                                                                                                                                                                                                                                                                                           | Population                                                                                                             | Sponsor/ Collaborators                                                                                                           | Funder Type | Dates                                                                                                                                                                                                                                                                                          | Locations                                                        |
|------------|------------------------------------------------------------------------------------------------------------------------------------------------------------|---------------------------------------------------------------------|----------------|----------------|----------------------------------------------------------------------------------------------------------------------------------------------------------------------------------------------|-----------------------------------------------------------------------------------------------------------------------------------------------------------------------------------------------------------------------------------------------------------------------------------------------------------------------------------------------------------------------------------------------------------------------------------------------------------------------------------------------------------|------------------------------------------------------------------------------------------------------------------------|----------------------------------------------------------------------------------------------------------------------------------|-------------|------------------------------------------------------------------------------------------------------------------------------------------------------------------------------------------------------------------------------------------------------------------------------------------------|------------------------------------------------------------------|
| 1          | <p>NCT02103036</p> <p><a href="#">Valuation of the Low Back Pain Treated With Different Types of Active Exercises in Women</a></p> <p>Study Documents:</p> | <p>Title Acronym:<br/>ECOLUM</p> <hr/> <p>Other Ids:<br/>ECOLUM</p> | Unknown status | •Low Back Pain | <ul style="list-style-type: none"> <li>•Procedure: Core Stability Exercises (CSE)</li> <li>•Procedure: Traditional Back School</li> <li>•Device: TENS</li> <li>•Device: Infra-red</li> </ul> | <p>Study Type:<br/>Interventional</p> <hr/> <p>Phase:<br/>Not Applicable</p> <hr/> <p>Study Design:</p> <ul style="list-style-type: none"> <li>•Allocation: Randomized</li> <li>•Intervention Model: Parallel Assignment</li> <li>•Masking: Single (Participant)</li> <li>•Primary Purpose: Treatment</li> </ul> <hr/> <p>Outcome Measures:</p> <ul style="list-style-type: none"> <li>•Changes in Visual Scale Analogue (VAS)</li> <li>•Changes in the Roland-Morris Disability Questionnaire</li> </ul> | <p>Enrollment:<br/>30</p> <hr/> <p>Age:<br/>18 Years to 70 Years (Adult, Older Adult)</p> <hr/> <p>Sex:<br/>Female</p> | <ul style="list-style-type: none"> <li>•University Rovira i Virgili</li> <li>•Hospital Universitari Sant Joan de Reus</li> </ul> | •Other      | <p>Study Start:<br/>March 2014</p> <hr/> <p>Primary Completion:<br/>March 2015</p> <hr/> <p>Study Completion:<br/>October 2015</p> <hr/> <p>First Posted:<br/>April 3, 2014</p> <hr/> <p>Results First Posted:<br/>No Results Posted</p> <hr/> <p>Last Update Posted:<br/>December 5, 2014</p> | •Faculty of Medicine and Health Sciences, Reus, Tarragona, Spain |
